# Supplementary material
Source: PubMed Central journal article supplement (PMC2583495)
Supplement: supp_74_22_6987__1.pdf [file supp_74_22_6987__1.pdf]

**Table S1.** GenBank acc. nos. for the 80 *atpD*, *glnII*, *recA* and *rpoB* partial sequences of Asiatic isolates and 37 *rpoB* sequences for reference strains previously studied by Vinuesa *et al.* (2005). See Table 1 of the main text for geographic and ecological information about the origin of the isolates. Figure 1 of the main text provides the classification of the isolates and reference strains.

| Isolate | <i>atpD</i> | <i>glnII</i> | <i>recA</i> | <i>rpoB</i> | ref Strain  | <i>rpoB</i> |
|---------|-------------|--------------|-------------|-------------|-------------|-------------|
| BuCeG2  | EU574088    | EU574168     | EU574248    | EU574328    | BC-C1       | EF190155    |
| BuCeG3  | EU574089    | EU574169     | EU574249    | EU574329    | BC-C2       | EF190156    |
| BuCeG4  | EU574090    | EU574170     | EU574250    | EU574330    | BC-MAM1     | EF190157    |
| BuCeR1  | EU574091    | EU574171     | EU574251    | EU574331    | BC-MAM11    | EF190158    |
| BuCeR2  | EU574092    | EU574172     | EU574252    | EU574332    | BC-MAM2     | EF190159    |
| BuCeR3  | EU574093    | EU574173     | EU574253    | EU574333    | BC-MAM5     | EF190160    |
| BuCeR4  | EU574094    | EU574174     | EU574254    | EU574334    | BC-MAM6     | EF190161    |
| BuCeR5  | EU574095    | EU574175     | EU574255    | EU574335    | BC-MAM9     | EF190162    |
| BuMiN1  | EU574096    | EU574176     | EU574256    | EU574336    | BC-MK6      | EF190163    |
| BuMiN2  | EU574097    | EU574177     | EU574257    | EU574337    | BC-P14      | EF190164    |
| BuMiN3  | EU574098    | EU574178     | EU574258    | EU574338    | BC-P22      | EF190165    |
| BuMiN4  | EU574099    | EU574179     | EU574259    | EU574339    | BC-P6       | EF190166    |
| BuMiN6  | EU574100    | EU574180     | EU574260    | EU574340    | BES-1       | EF190167    |
| BuMiT1  | EU574101    | EU574181     | EU574261    | EU574341    | BES-2       | EF190168    |
| BuMiT10 | EU574102    | EU574182     | EU574262    | EU574342    | BGA-1       | EF190169    |
| BuMiT3  | EU574103    | EU574183     | EU574263    | EU574343    | BLup-MR1    | EF190170    |
| BuMiT4  | EU574104    | EU574184     | EU574264    | EU574344    | BRE-1       | EF190171    |
| BuMiT5  | EU574105    | EU574185     | EU574265    | EU574345    | BRE-4       | EF190172    |
| BuMiT6  | EU574106    | EU574186     | EU574266    | EU574346    | BTAi1       | EF190173    |
| BuMiT7  | EU574107    | EU574187     | EU574267    | EU574347    | CCBAU10071T | EF190174    |
| BuMiT8  | EU574108    | EU574188     | EU574268    | EU574348    | CIAT3101    | EF190175    |
| BuMiT9  | EU574109    | EU574189     | EU574269    | EU574349    | DSMZ30131T  | EF190176    |
| BuNoG1  | EU574110    | EU574190     | EU574270    | EU574350    | FN13        | EF190177    |
| BuNoG4  | EU574111    | EU574191     | EU574271    | EU574351    | IRBG127     | EF190178    |
| BuNoG5  | EU574112    | EU574192     | EU574272    | EU574352    | IRBG231     | EF190179    |
| BuNoR1  | EU574113    | EU574193     | EU574273    | EU574353    | ISLU16      | EF190180    |
| BuNoR2  | EU574114    | EU574194     | EU574274    | EU574354    | LMG18230T   | EF190181    |
| BuNoR3  | EU574115    | EU574195     | EU574275    | EU574355    | LMTR28      | EF190182    |
| BuNoR4  | EU574116    | EU574196     | EU574276    | EU574356    | Nep1        | EF190183    |
| InBu02  | EU574117    | EU574197     | EU574277    | EU574357    | Spr3-7      | EF190184    |
| InIn01  | EU574118    | EU574198     | EU574278    | EU574358    | TAL760      | EF190185    |
| InIn02  | EU574119    | EU574199     | EU574279    | EU574359    | USDA122     | EF190186    |
| InIn03  | EU574120    | EU574200     | EU574280    | EU574360    | USDA46      | EF190187    |
| InIn04  | EU574121    | EU574201     | EU574281    | EU574361    | USDA76T     | EF190188    |
| InIn05  | EU574122    | EU574202     | EU574282    | EU574362    | USDA94      | EF190189    |
| InIn08  | EU574123    | EU574203     | EU574283    | EU574363    | X3-1        | EF190190    |
| InIn09  | EU574124    | EU574204     | EU574284    | EU574364    | X6-9        | EF190191    |
| InIn10  | EU574125    | EU574205     | EU574285    | EU574365    |             |             |
| InJa01  | EU574126    | EU574206     | EU574286    | EU574366    |             |             |
| InJa02  | EU574127    | EU574207     | EU574287    | EU574367    |             |             |
| InJa03  | EU574128    | EU574208     | EU574288    | EU574368    |             |             |
| InJa04  | EU574129    | EU574209     | EU574289    | EU574369    |             |             |
| InJa05  | EU574130    | EU574210     | EU574290    | EU574370    |             |             |
| InJa06  | EU574131    | EU574211     | EU574291    | EU574371    |             |             |
| InJa07  | EU574132    | EU574212     | EU574292    | EU574372    |             |             |
| InJa08  | EU574133    | EU574213     | EU574293    | EU574373    |             |             |
| InJa09  | EU574134    | EU574214     | EU574294    | EU574374    |             |             |

|        |          |          |          |          |
|--------|----------|----------|----------|----------|
| InKo01 | EU574135 | EU574215 | EU574295 | EU574375 |
| InKo02 | EU574136 | EU574216 | EU574296 | EU574376 |
| InRo02 | EU574137 | EU574217 | EU574297 | EU574377 |
| NeMa01 | EU574138 | EU574218 | EU574298 | EU574378 |
| NeMa02 | EU574139 | EU574219 | EU574299 | EU574379 |
| NeMa10 | EU574140 | EU574220 | EU574300 | EU574380 |
| NeMa11 | EU574141 | EU574221 | EU574301 | EU574381 |
| NeMa12 | EU574142 | EU574222 | EU574302 | EU574382 |
| NeMa16 | EU574143 | EU574223 | EU574303 | EU574383 |
| NeRa01 | EU574144 | EU574224 | EU574304 | EU574384 |
| NeRa02 | EU574145 | EU574225 | EU574305 | EU574385 |
| NeRa03 | EU574146 | EU574226 | EU574306 | EU574386 |
| NeRa04 | EU574147 | EU574227 | EU574307 | EU574387 |
| NeRa05 | EU574148 | EU574228 | EU574308 | EU574388 |
| NeRa06 | EU574149 | EU574229 | EU574309 | EU574389 |
| NeRa07 | EU574150 | EU574230 | EU574310 | EU574390 |
| NeRa08 | EU574151 | EU574231 | EU574311 | EU574391 |
| NeRa11 | EU574152 | EU574232 | EU574312 | EU574392 |
| NeRa12 | EU574153 | EU574233 | EU574313 | EU574393 |
| NeRa14 | EU574154 | EU574234 | EU574314 | EU574394 |
| NeRa15 | EU574155 | EU574235 | EU574315 | EU574395 |
| NeRa16 | EU574156 | EU574236 | EU574316 | EU574396 |
| ViHaG3 | EU574157 | EU574237 | EU574317 | EU574397 |
| ViHaG4 | EU574158 | EU574238 | EU574318 | EU574398 |
| ViHaG5 | EU574159 | EU574239 | EU574319 | EU574399 |
| ViHaG6 | EU574160 | EU574240 | EU574320 | EU574400 |
| ViHaG7 | EU574161 | EU574241 | EU574321 | EU574401 |
| ViHaG8 | EU574162 | EU574242 | EU574322 | EU574402 |
| ViHaR1 | EU574163 | EU574243 | EU574323 | EU574403 |
| ViHaR2 | EU574164 | EU574244 | EU574324 | EU574404 |
| ViHaR3 | EU574165 | EU574245 | EU574325 | EU574405 |
| ViHaR4 | EU574166 | EU574246 | EU574326 | EU574406 |
| ViHaR5 | EU574167 | EU574247 | EU574327 | EU574407 |
